# Supplementary material for: A water-stable lanthanide-organic framework as a recyclable luminescent probe for detecting pollutant phosphorus anions
Source: Royal Society of Chemistry journal article supplement (doi:10.1039/c5cc02596f), 2015-01-01
Supplement: c5cc02596f1.pdf [file c5cc02596f1.pdf]

## Supplementary Information

# **A water-stable lanthanide-organic framework as recyclable luminescent probe for detecting pollutant phosphorus anions**

Hang Xu, Chun-Shuai Cao, Bin Zhao\*

*Department of Chemistry, Key Laboratory of Advanced Energy Material Chemistry, MOE, and Collaborative Innovation Center of Chemical Science and Engineering (Tianjin), Nankai University, Tianjin 300071, China. Fax: (+86)-22-23502458 E-mail: [zhaobin@nankai.edu.cn](mailto:zhaobin@nankai.edu.cn).*

### **Experimental Section**

#### **Materials and methods**

All reagents and reactants were purchased commercially and were used directly without further purification. The C, H and N microanalyses were obtained at the Institute of Elemental Organic Chemistry, Nankai University. Powder X-ray diffraction and thermodiffractogram measurements were carried out on an Ultima IV X-ray diffractometer using Cu-K $\alpha$  radiation. Thermogravimetric analyses (TGA) were recorded with a Netzsch TG 209 TG-DTA analyzer under a nitrogen atmosphere. The fluorescent spectra were measured on an F-4500 FL Spectrophotometer.

#### **Synthesis of {[Eu<sub>1.5</sub>(BTB)<sub>1.5</sub>(H<sub>2</sub>O)]·3DMF}<sub>n</sub>.**

A mixture of Eu(OAc)<sub>3</sub>·4H<sub>2</sub>O (0.1 mmol, 40.1 mg), H<sub>3</sub>BTB (0.1 mmol, 43.8 mg) and LiOH·H<sub>2</sub>O (0.2 mmol, 8.4 mg) in DMA (3.5 mL) and H<sub>2</sub>O (1 mL) were sealed in a 15 mL Teflon-lined stainless steel autoclave. The autoclave was heated at 130 °C for 3 days under autogenous pressure and then cooled to room temperature 2 °C/h under ambient conditions. The colorless crystals were obtained and washed with DMF. Yield: 80 %, based on Eu(OAc)<sub>3</sub>·4H<sub>2</sub>O. Elemental analysis (%) Calcd for compound **1**: C 53.15, H 4.07, N 3.76. Found: C 54.13, H 4.27, N 3.91.

#### **X-Ray crystallography**

Suitable crystal **1** was paced in a cooled N<sub>2</sub> gas stream at ~130 K for crystallographic data collection on a SuperNova Single Crystal Diffractometer equipped with graphite-monochromatic Mo-K $\alpha$  radiation ( $\lambda = 0.71073$  Å). Data reduction included absorption was performed by using the SAINT program.<sup>1</sup> The structures were solved by direct methods and refined by full-matrix least squares on F<sup>2</sup> with SHELXS-97 and SHELXL-97 programs.<sup>2</sup> All the hydrogen atoms were placed geometrically and refined using a riding model.

We used PLATON/SQUEEZE<sup>3</sup> to calculate the contribution to the diffraction from the solvent region. The number of isolated DMF molecules was determined by TG analyses and elemental microanalyses. Detailed crystal data and structure refinement for **1** are shown in Table 1S.

**Table 1S** Crystal data and structure refinement for **1**

| Identification code                                  | <b>1</b>                                                        |
|------------------------------------------------------|-----------------------------------------------------------------|
| Empirical formula                                    | C <sub>81</sub> H <sub>49</sub> O <sub>20</sub> Eu <sub>3</sub> |
| Formula weight                                       | 1798.08                                                         |
| Temperature/K                                        | 121(2)                                                          |
| Crystal system                                       | monoclinic                                                      |
| Space group                                          | <i>P2/c</i>                                                     |
| <i>a</i> /Å                                          | 10.8511(6)                                                      |
| <i>b</i> /Å                                          | 28.8803(13)                                                     |
| <i>c</i> /Å                                          | 19.1550(8)                                                      |
| $\alpha$ /°                                          | 90.00                                                           |
| $\beta$ /°                                           | 123.902(3)                                                      |
| $\gamma$ /°                                          | 90.00                                                           |
| Volume/Å <sup>3</sup>                                | 4982.3(4)                                                       |
| <i>Z</i>                                             | 2                                                               |
| <i>F</i> (000)                                       | 1768.0                                                          |
| Goodness-of-fit on <i>F</i> <sup>2</sup>             | 0.967                                                           |
| Final <i>R</i> indexes [ <i>I</i> >= 2σ( <i>I</i> )] | <i>R</i> <sub>1</sub> = 0.0821, <i>wR</i> <sub>2</sub> = 0.2107 |
| Final <i>R</i> indexes [all data]                    | <i>R</i> <sub>1</sub> = 0.1009, <i>wR</i> <sub>2</sub> = 0.2297 |

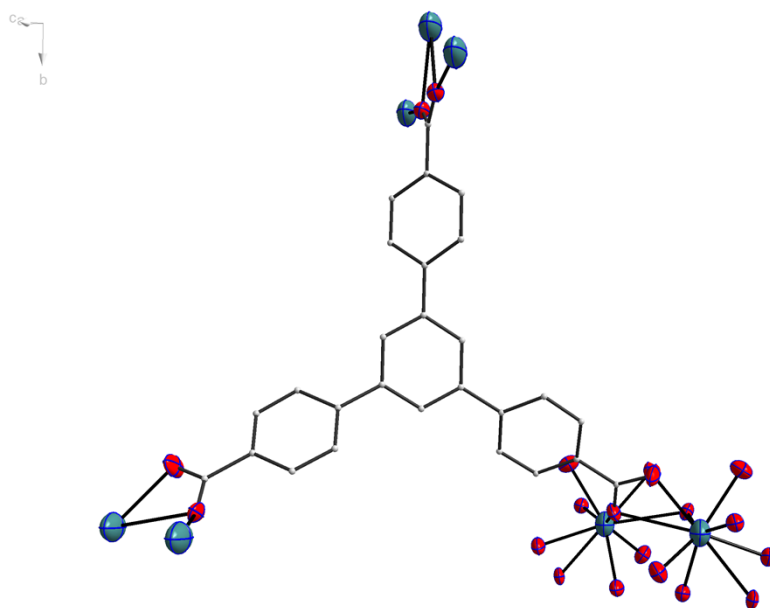**Fig. S1.** The coordinated environments of Eu<sup>3+</sup> and BTB<sup>3-</sup> ligand in **1**.

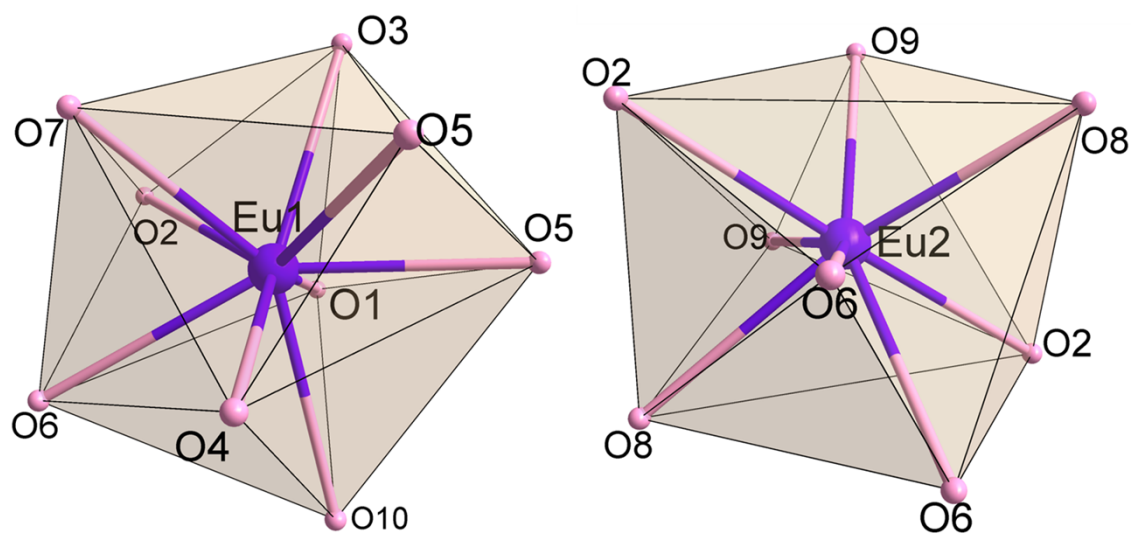

**Fig. S2.** The coordinated environments and the polyhedral representation of Eu<sup>3+</sup>.

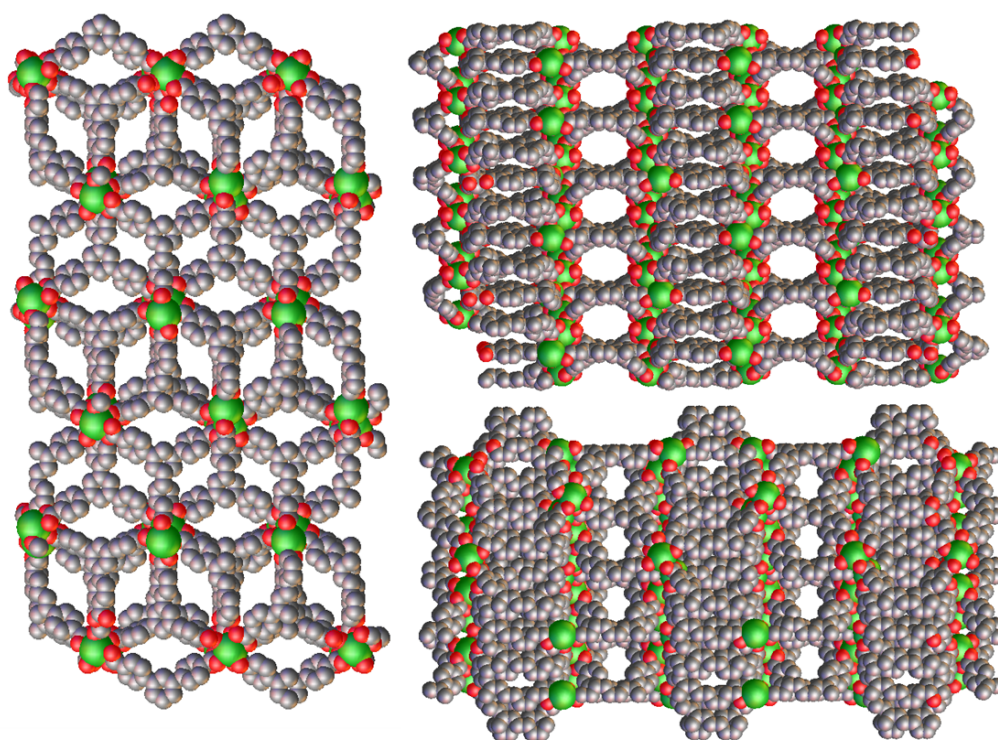

**Fig. S3.** The 3D framework of **1** exhibits three types of channels in packing mode.

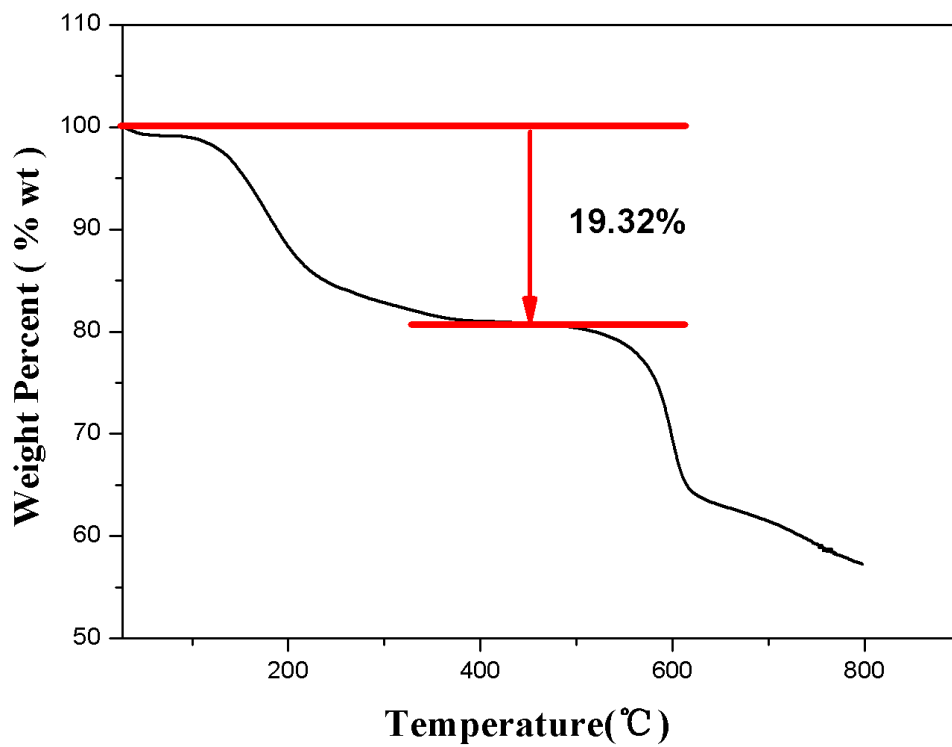

Fig. S4. Thermogravimetric analyses curve of **1**, the weight loss of 19.32% is close to the calculated value (19.60%).

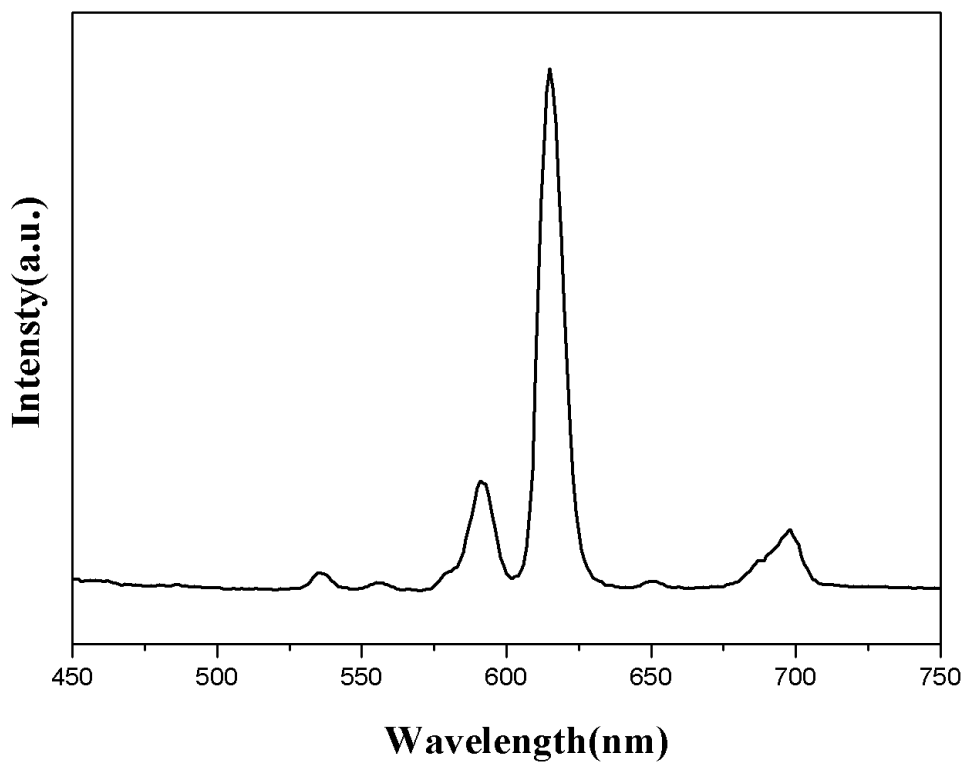

Fig. S5. The emission spectra of **1** ( $\lambda_{\text{excited}} = 305 \text{ nm}$ )

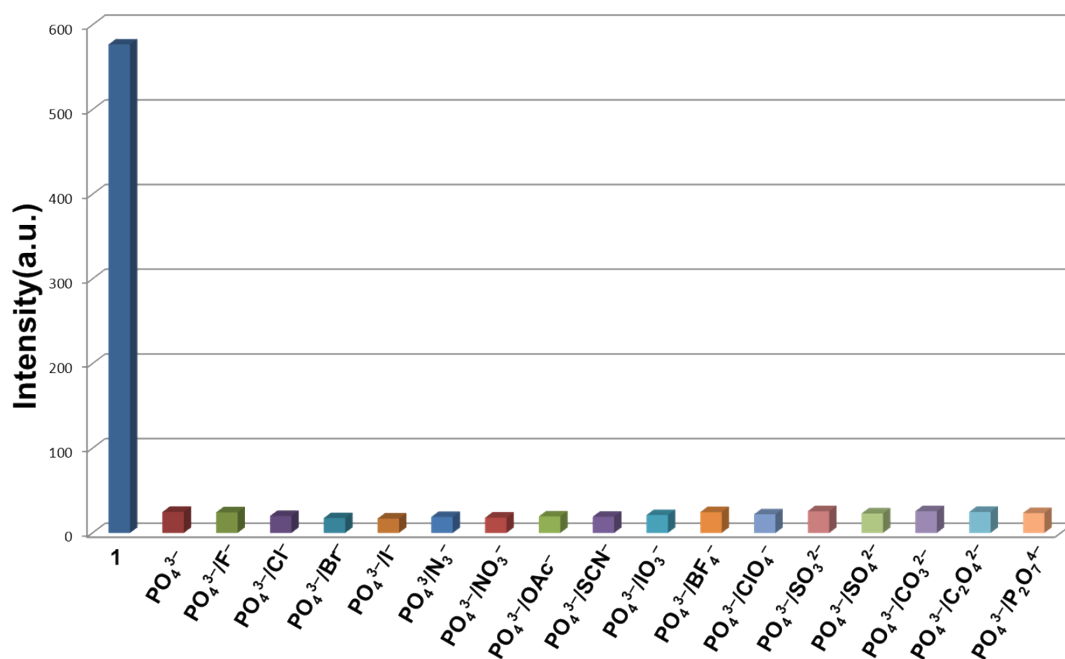

Fig. S6. Comparison of the luminescence intensity of **1** under mixed anions ( $10^{-3}$  M).

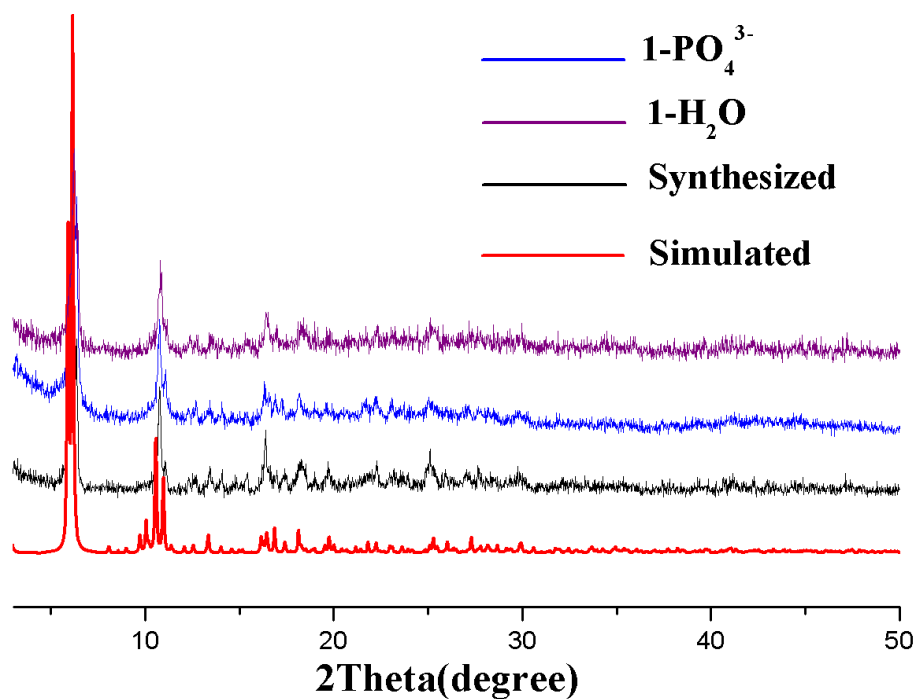

Fig. S7. Powder XRD of simulated from the single-crystal data of **1** (red), as-synthesized compound **1** (black), **1** immersing in  $H_2O$  (**1**- $H_2O$ , purple) and **1**- $PO_4^{3-}$  (blue).

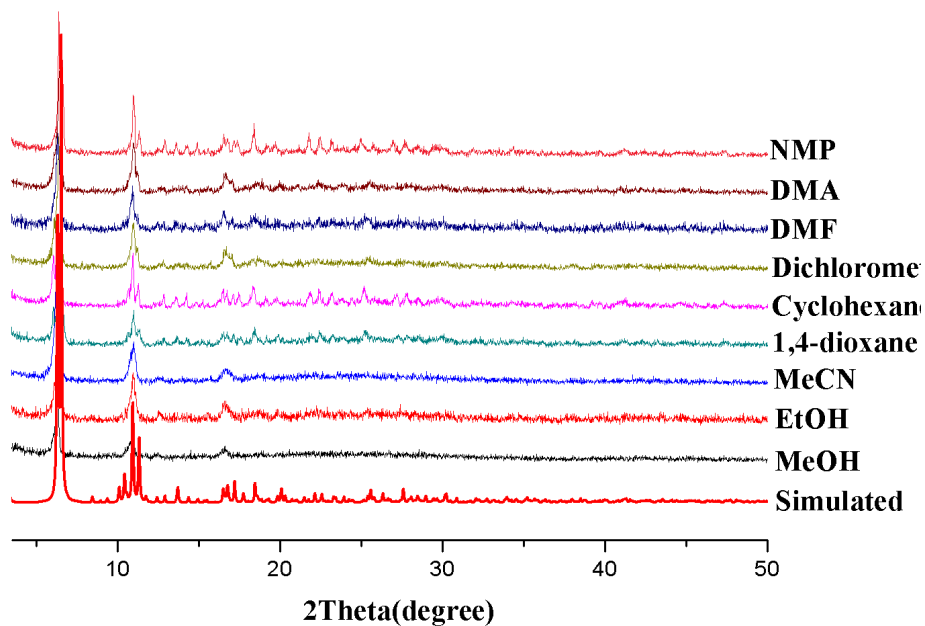

Fig. S8 The PXR D patterns of compound 1 after immersing in various organic solvent.

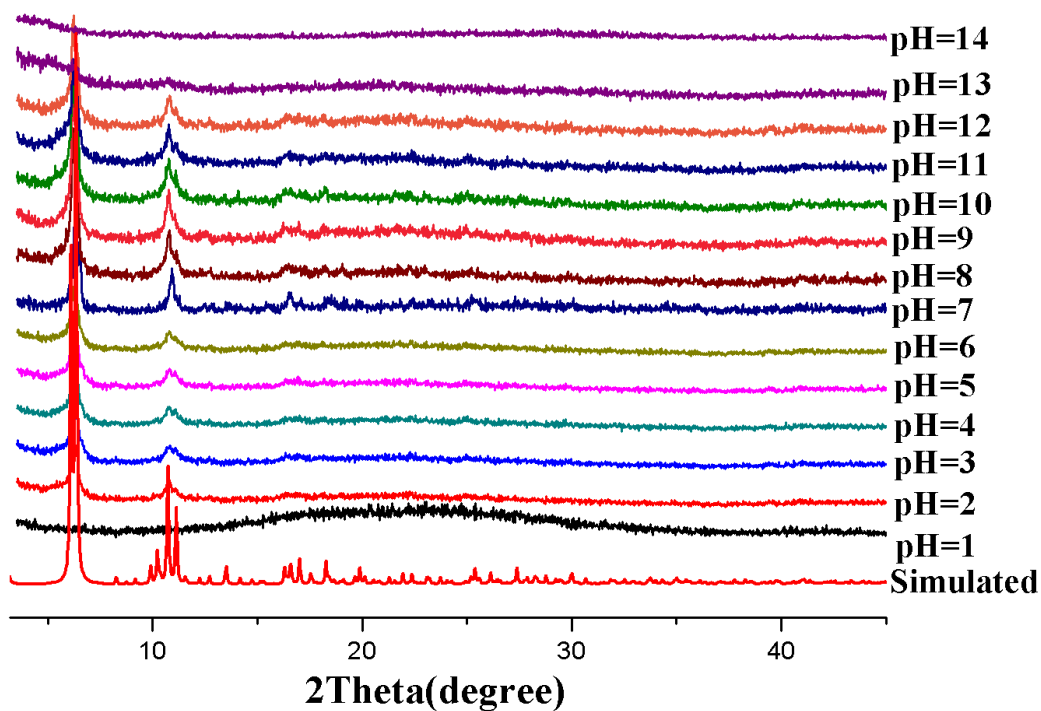

Fig. S9. The PXR D patterns of 1 after exposure to aqueous solution with various pH values from 1.0 to 14.0.

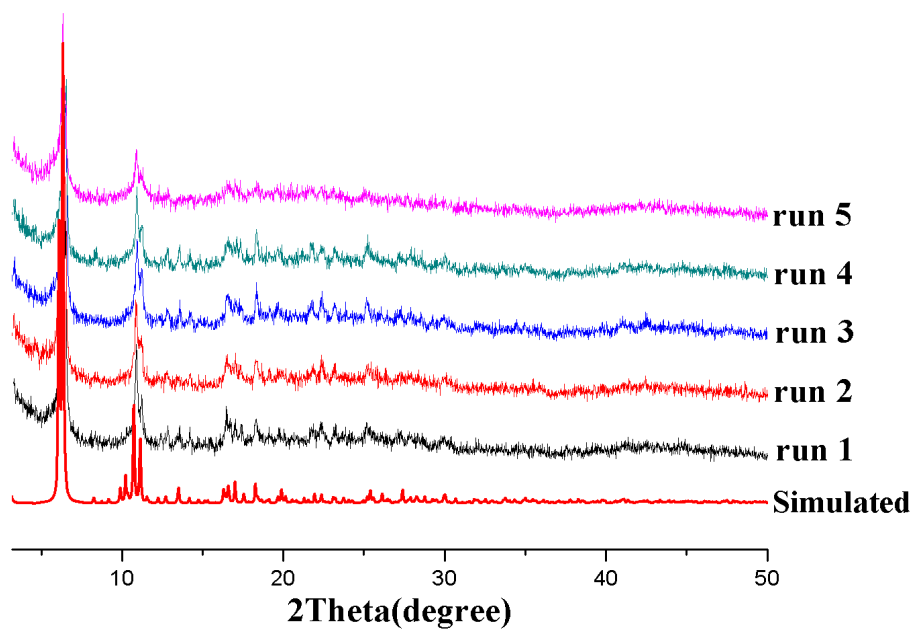

Fig. S10. The PXRD patterns of **1** after five recyclings.

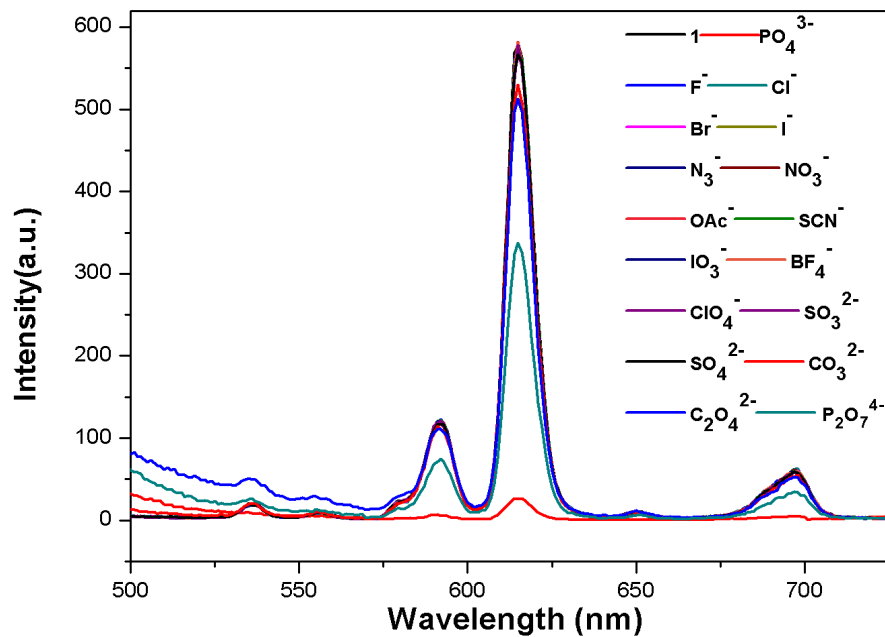

Fig. S11. Comparison of the luminescence intensity of **1-X** in  $10^{-3}$  M different anions

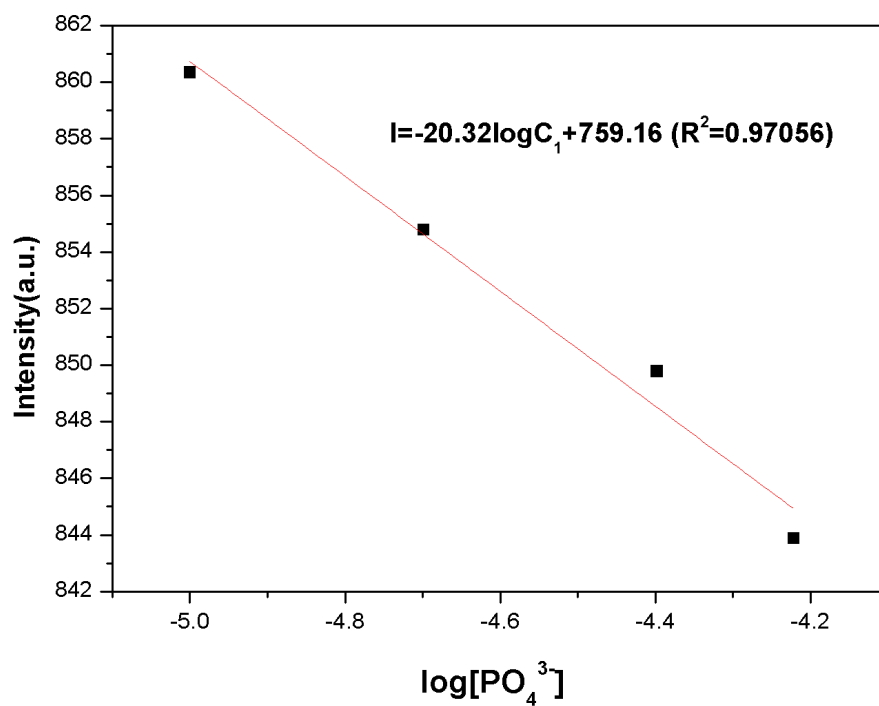

**Fig. S12.** The intensity plots of **1** vs  $\log[\text{PO}_4^{3-}]$ .

1 SAINT<sup>+</sup>, version 6.22; Bruker AXS: Madison, 2001.

2 G. Sheldrick, *Acta Crystallogr., Sect. A: Fundam. Crystallogr.*, 2008, **64**, 112.

3 A. L. Spek, *PLATON, A Multipurpose Crystallographic Tool*, Utrecht University, Utrecht, The Netherlands, 2001.
